# MIND TO MIND

*Creative writing that explores the abstract side  
of our profession and our lives*

*Carol Wiley Cassella, M.D., Editor*

## **Lilly Was 32**

Burke T. Bradley, M.D.

A  
And we instead  
Shall all grow old and die of so much lesser things,  
Wrinkled and tired and feigning to relive  
The battles that were never big enough to measure us anyway.  
We will go quietly, quieter than we had hoped,  
Ignoring the ignoble things, the obvious and the boots  
That we never lived enough to die in anyway.  
We will surely leave here a little too late,  
A little too slowly, dropping the broken things  
And the pretense  
That we could ever be done with this life anyway.

And those few we must leave behind,  
Those few whom we should have died for  
Not in front of,  
Those few will surely gather to shovel the dirt and casserole  
And to comfort the living in small voices about this "blessing"  
That was our passing  
That was us losing the right of the dying to die fighting  
So the living might live through the losing of someone worth knowing  
And our passing too  
Would really be no blessing at all.

From the U.S. Anesthesia Partners, Houston Methodist Hospital System, Houston, Texas. burketbrad@yahoo.com

Accepted for publication February 10, 2016.

Permission to reprint granted to the American Society of Anesthesiologists, Inc., and Wolters Kluwer Health, Inc., by copyright author/owner.  
Anesthesiology 2016; 125:250
